# Supplementary material for: Facile Synthesis of Some Coumarin Derivatives and Their Cytotoxicity through VEGFR2 and Topoisomerase II Inhibition
Source: MDPI journal article supplement (doi:10.3390/molecules27238279), 2022-11-28

RAMADAN/DR. EL ASHRY/1A/CDCL3

AVANCE AV 300  
LAB. No. 115

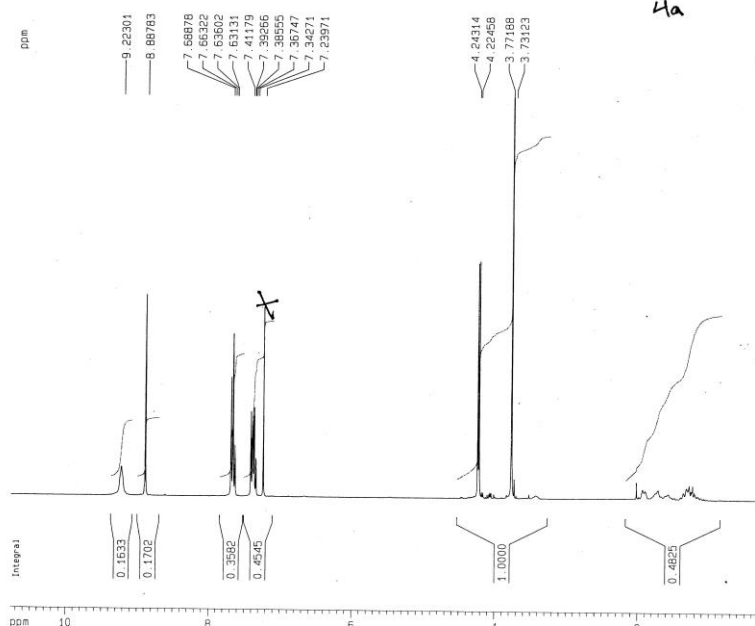

Current Data Parameters  
NAME oct31  
EXPNO 5  
PROCNO 1

F2 - Acquisition Parameters  
Date\_ 20071031  
Time 12.50  
INSTRUM spect  
PROBHD 5 mm QNP 13C-1  
PULPROG zg30  
TD 32768  
SOLVENT CDCl3  
NS 128  
DS 0  
SWH 5995.204 Hz  
FIDRES 0.163959 Hz  
AQ 2.7329011 sec  
RG 1149.4  
OW 83.400 usec  
DE 10.00 usec  
TE 0.0 K  
D1 1.00000000 sec  
MCREST 0.00000000 sec  
MCMRK 0.01500000 sec

\*\*\*\*\* CHANNEL f1 \*\*\*\*\*  
NUC1 1H  
P1 9.80 usec  
PL1 -3.00 dB  
SF01 300.1324010 MHz

F2 - Processing parameters  
SI 16384  
SF 300.1300123 MHz  
WDW EM  
SSB 0  
LB 0.30 Hz  
GB 0  
PC 1.00

1D NMR plot parameters  
CX 20.00 cm  
CY 20.00 cm  
F1P 10.771 ppm  
F1 3232.55 Hz  
F2P 0.229 ppm  
F2 68.68 Hz  
P1MCM 0.52710 ppm/cm  
H2CM 158.19836 Hz/cm

File Name d:\mswin\data\1-a.mss  
Creation Date/Time 05/11/07 at 12:28:31  
File Type Lo-Res Mass Data (Centroid)  
File Source Acquired on MASPEC system [msw/A091]  
File Title EI  
Operator Barkat Ali  
Instrument MAT312

SCAN GRAPH. Flagging=M/z. Filter=[int:1%].  
%age Scan 9-6:10. Entries=40. 100% Int.=20874.

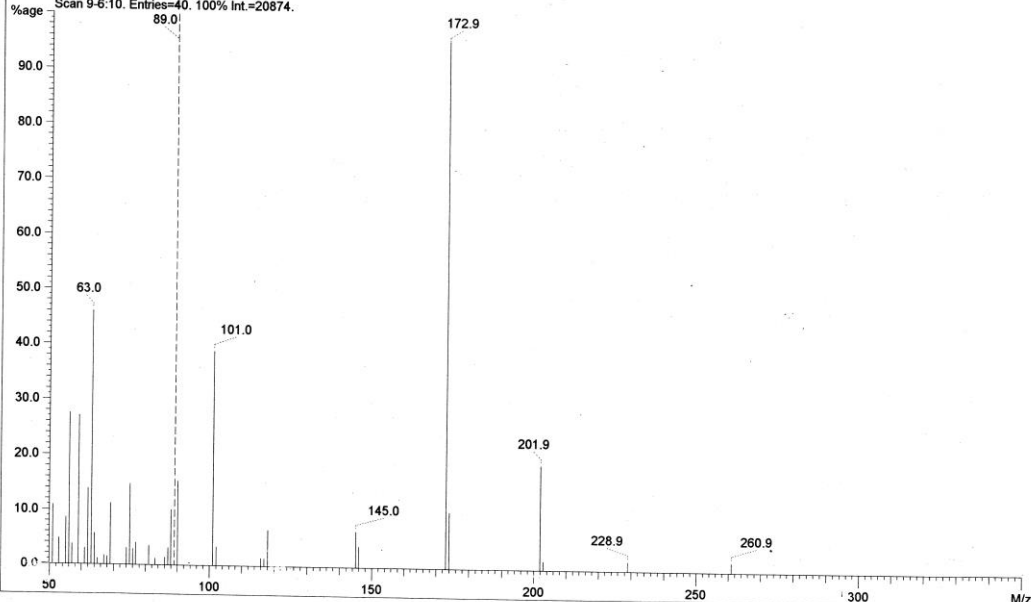

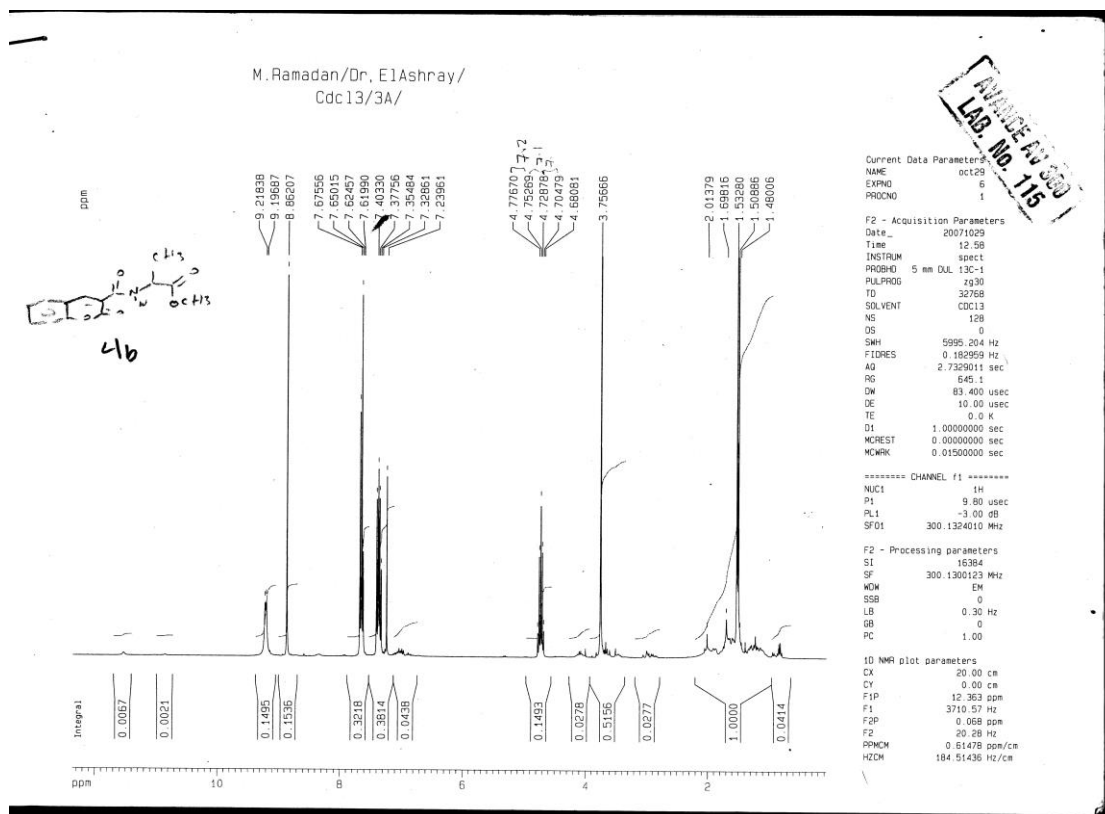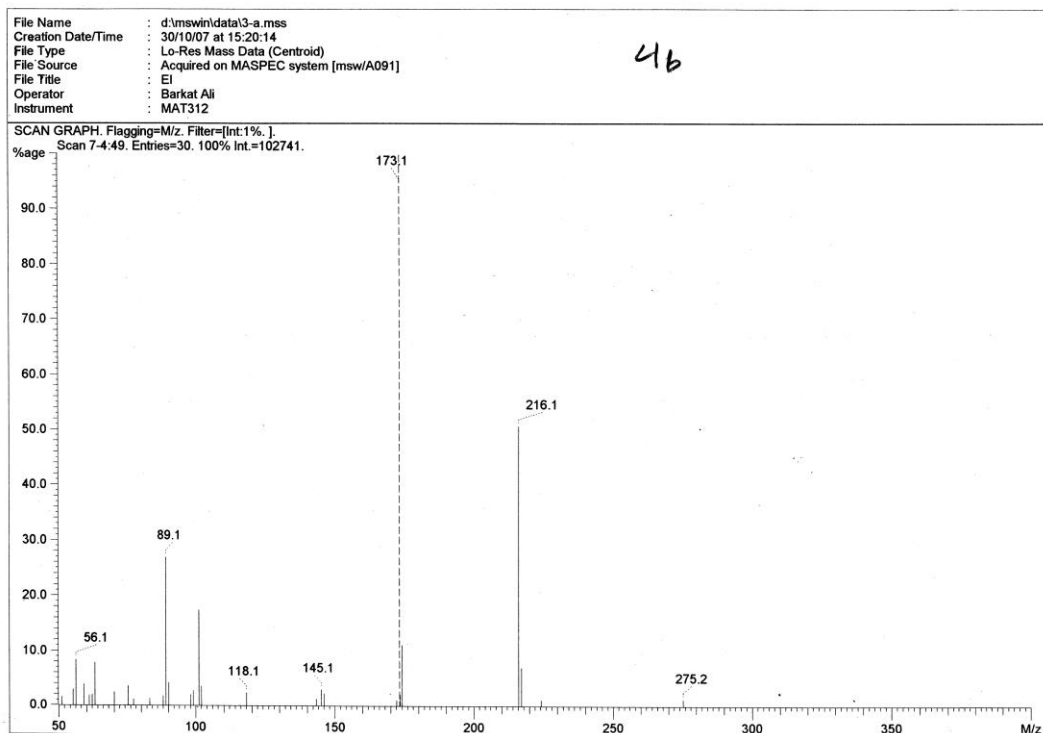

M. Ramadan/Dr. Elashry/  
Cdc13/4A/

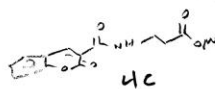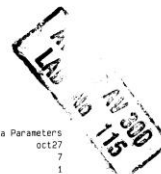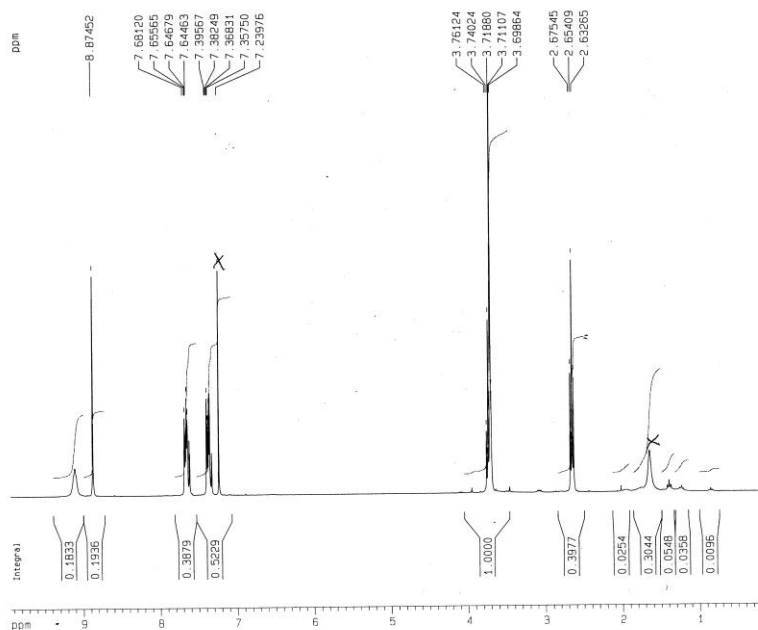

Current Data Parameters  
NAME oct27  
EXPNO 7  
PROCNO 1

F2 - Acquisition Parameters  
Date\_ 20071027  
Time 14.24  
INSTRUM spect  
PROBHD 5 mm DUL 13C-1  
PULPROG zg30  
TD 32768  
SOLVENT CDC13  
NS 128  
DS 0  
SWH 5995.204 Hz  
FIDRES 0.182959 Hz  
AQ 2.7329011 sec  
RG 1149.4  
DM B3.400 usec  
DE 10.00 usec  
TE 0.0 K  
D1 1.00000000 sec  
MCREST 0.00000000 sec  
MCWRR 0.01500000 sec

\*\*\*\*\* CHANNEL f1 \*\*\*\*\*  
NUC1 1H  
P1 9.80 usec  
PL1 -3.00 dB  
SFO1 300.1324010 MHz

F2 - Processing parameters  
SI 16384  
SF 300.1300123 MHz  
WDW EM  
SSB 0  
LB 0.30 Hz  
GB 0  
PC 1.00

1D NMR plot parameters  
CX 20.00 cm  
CY 0.00 cm  
FIP 9.944 ppm  
F1 2984.61 Hz  
F2P 0.168 ppm  
F2 50.53 Hz  
PCMC 0.46880 ppm/cm  
HZCM 146.70403 Hz/cm

File Name : d:\mswin\data4-a-mss  
Creation Date/Time : 01/11/07 at 12:04:49  
File Type : Lo-Res Mass Data (Centroid)  
File Source : Acquired on MASPEC system [msw/A091]  
File Title :  
Operator : Barkat Ali  
Instrument : MAT312

4c

SCAN GRAPH. Flagging=M/z. Filter=[int:1%].  
Scan 8-5.43. Entries=31. 100% Int.=29850.

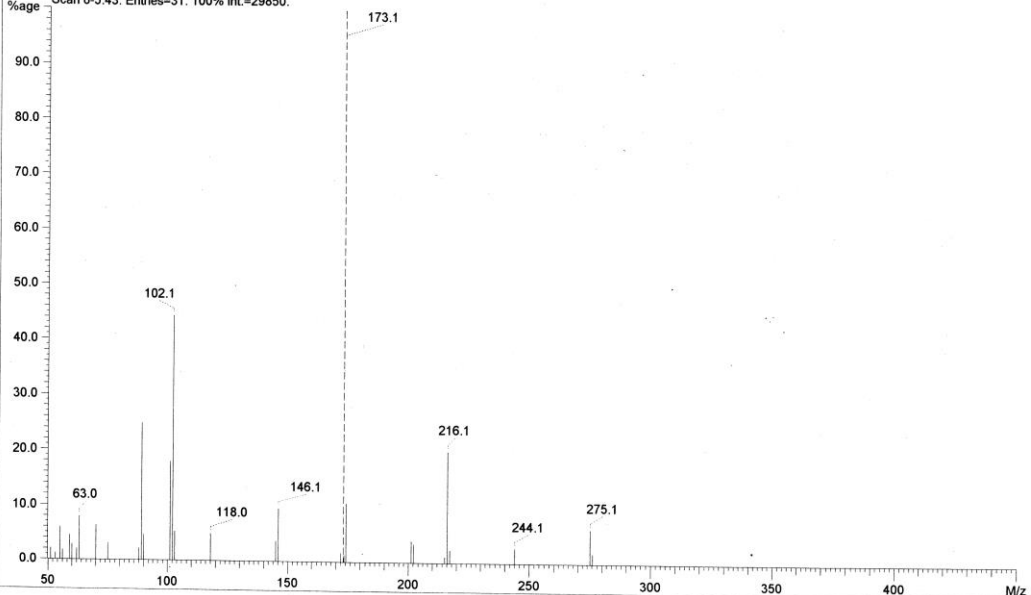

NIGHAT/DR. EL ASHRY/BA/CDCL3

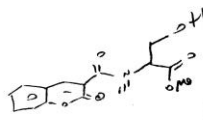

LAB. NO. 116

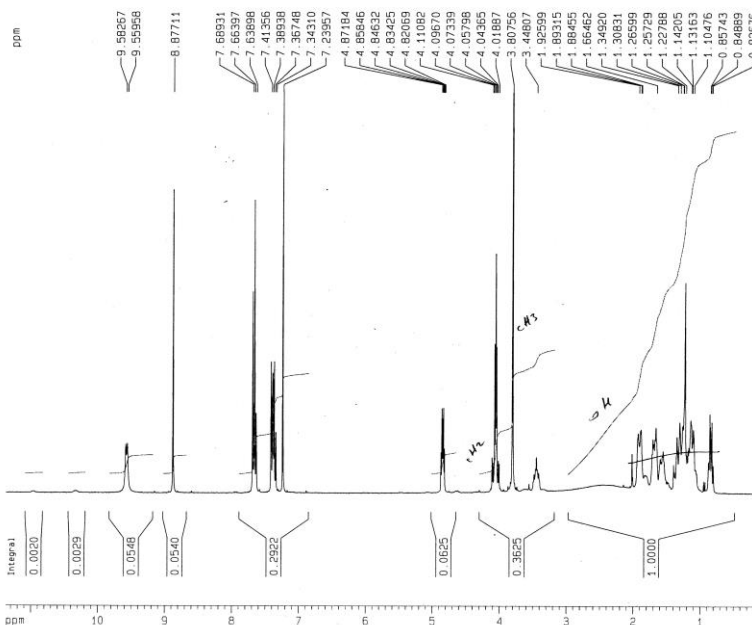

Current Data Parameters  
NAME nov06  
EXPNO 9  
PROCNO 1

F2 - Acquisition Parameters  
Date\_ 20071106  
Time 11.52  
INSTRUM spect  
PROBHD 5 mm QNP 13C-1  
PULPROG zg30  
TD 32768  
SOLVENT CDCL3  
NS 128  
DS 0  
SWH 5995.204 Hz  
FIDRES 0.182959 Hz  
AQ 2.7329011 sec  
RG 1625.5  
DM 83.400 usec  
DE 10.00 usec  
TE 0.0 K  
D1 1.00000000 sec  
MCHRES 0.00000000 sec  
MCNTR 0.01500000 sec

\*\*\*\*\* CHANNEL f1 \*\*\*\*\*  
NUC1 1H  
P1 9.80 usec  
PL1 -3.00 dB  
SFO1 300.1324010 MHz

F2 - Processing parameters  
SI 16384  
SF 300.1300123 MHz  
WDW EM  
SSB 0  
LB 0.30 Hz  
GB 0  
PC 1.00

1D NMR plot parameters  
CX 20.00 cm  
CY 30.00 cm  
F1P 11.376 ppm  
F1 3414.14 Hz  
F2P 0.128 ppm  
F2 38.43 Hz  
PPHMC 0.56237 ppm/cm  
HZCM 168.78526 Hz/cm

MASS SPECTRUM Data File: 8A 17-NOV-7 9:27  
Sample: HEJ  
Scan# (2) FAB (Pos.) GC 1.4c BP: m/z 149.0000 Int. 91.0609 Lu 1.00

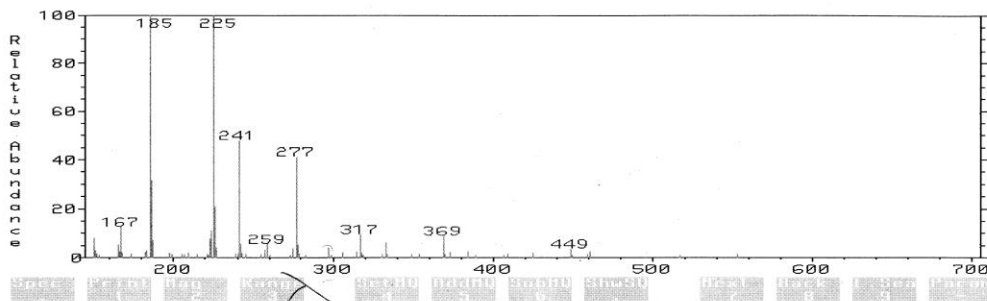

291.26  
292.26  
C14H13NO6

NIGHAT/DR.EL. ASHRY/6A/CDCL3

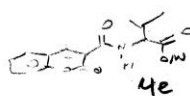

AVANCE AV 300  
LAB. No. 115

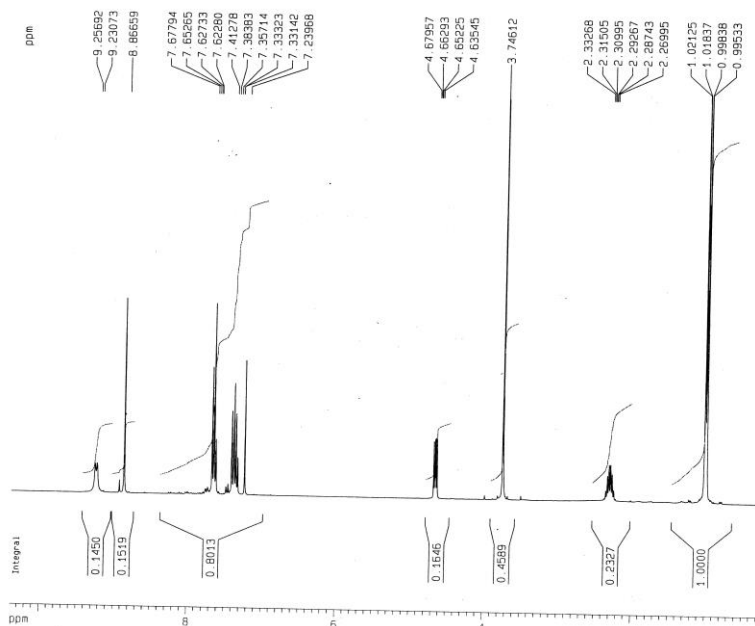

Current Data Parameters  
NAME nov01  
EXPNO 5  
PROCNO 1

F2 - Acquisition Parameters  
Date\_ 20071101  
Time 11.49  
INSTRUM spect  
PROBHD 5 mm DUL 13C-1  
PULPROG zg30  
TD 32768  
SOLVENT CDCL3  
NS 128  
DS 0  
SWH 5995.204 Hz  
FIDRES 0.182959 Hz  
AQ 2.7329011 sec  
RG 1149.4  
DM 83.400 usec  
DE 10.00 usec  
TE 0.0 K  
D1 1.00000000 sec  
MCREST 0.00000000 sec  
MCWRR 0.01500000 sec

\*\*\*\*\* CHANNEL f1 \*\*\*\*\*  
NUC1 1H  
P1 9.80 usec  
PL1 -3.00 dB  
SF01 300.1324010 MHz

F2 - Processing parameters  
SI 16384  
SF 300.1300123 MHz  
WDW EM  
SSB 0  
LB 0.30 Hz  
GB 0  
PC 1.00

1D NMR plot parameters  
CX 20.00 cm  
CY 20.00 cm  
FIP 10.388 ppm  
F1 3117.70 Hz  
F2 0.209 ppm  
F2 62.63 Hz  
PPMCM 0.50896 ppm/cm  
HZCM 152.75369 Hz/cm

HR

HEJ  
11/3/2007

Page 1

File: 6A  
Sample: NIGHAT  
Instrument: JEOL MSRoute  
Inlet: My Inlet

Date Run: 11-03-2007 (Time Run: 14:04:53)

Ionization mode: EI-

4e

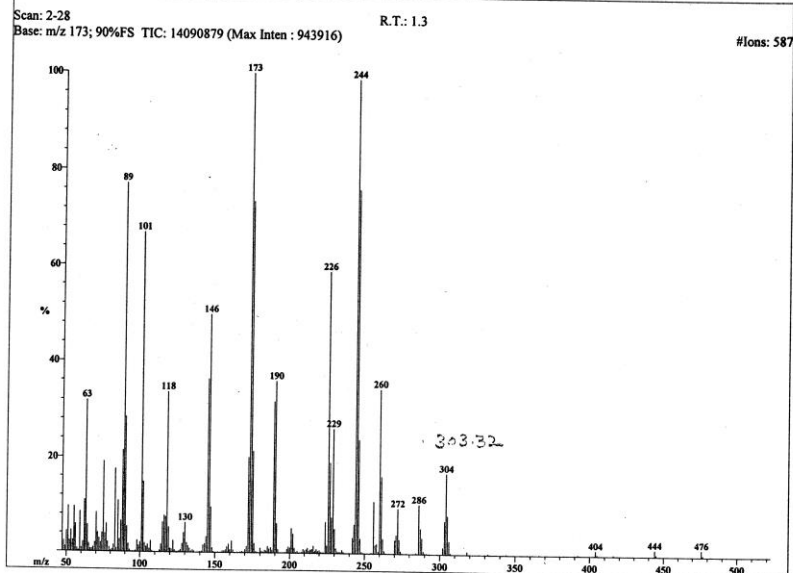

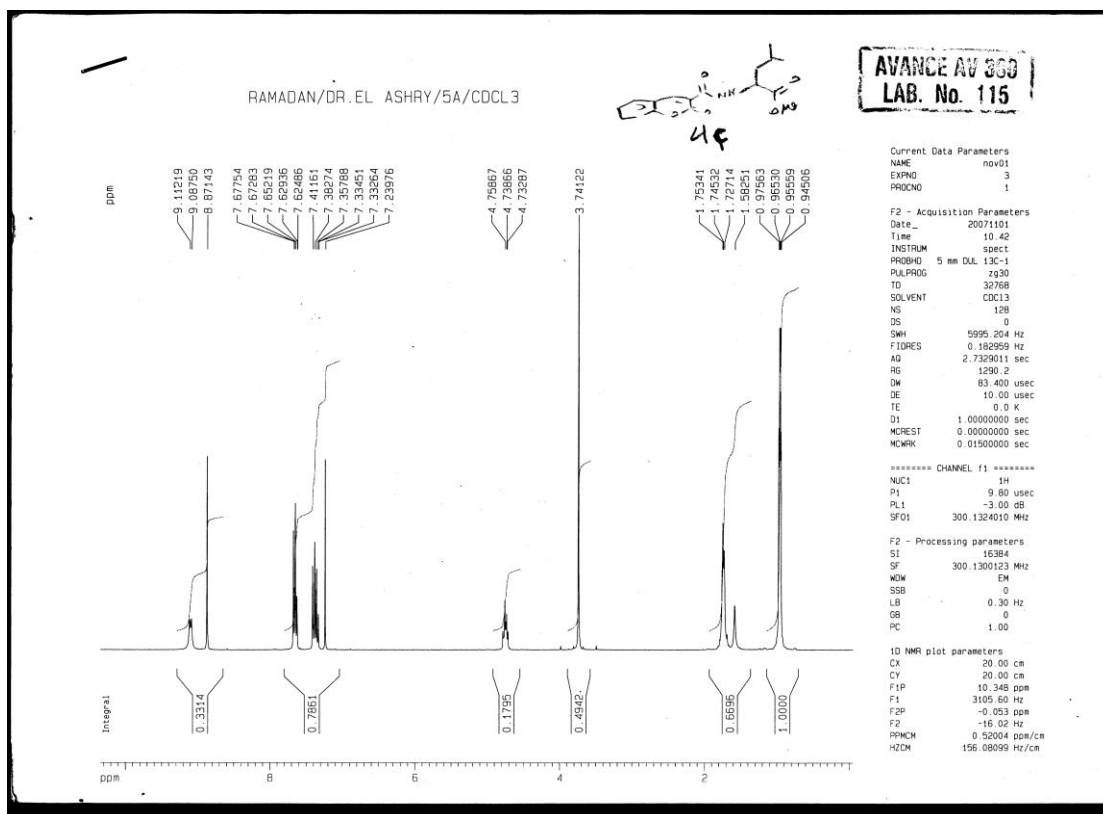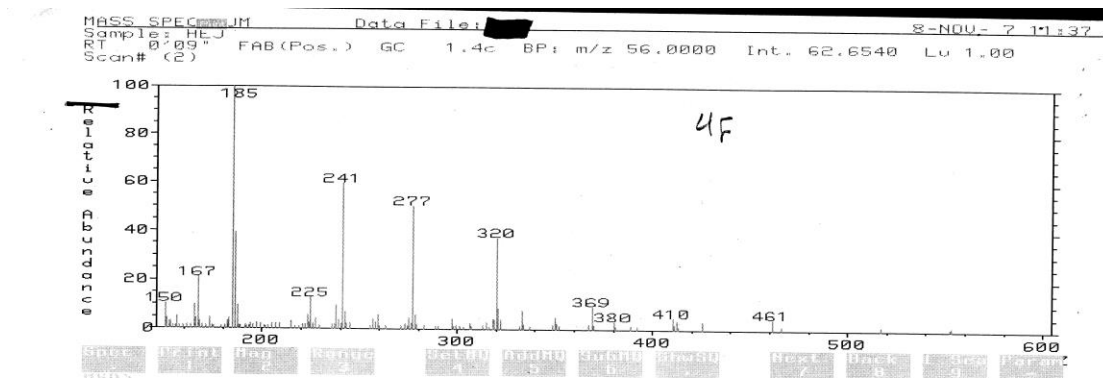

Ramdan

mwt = 317.34

?

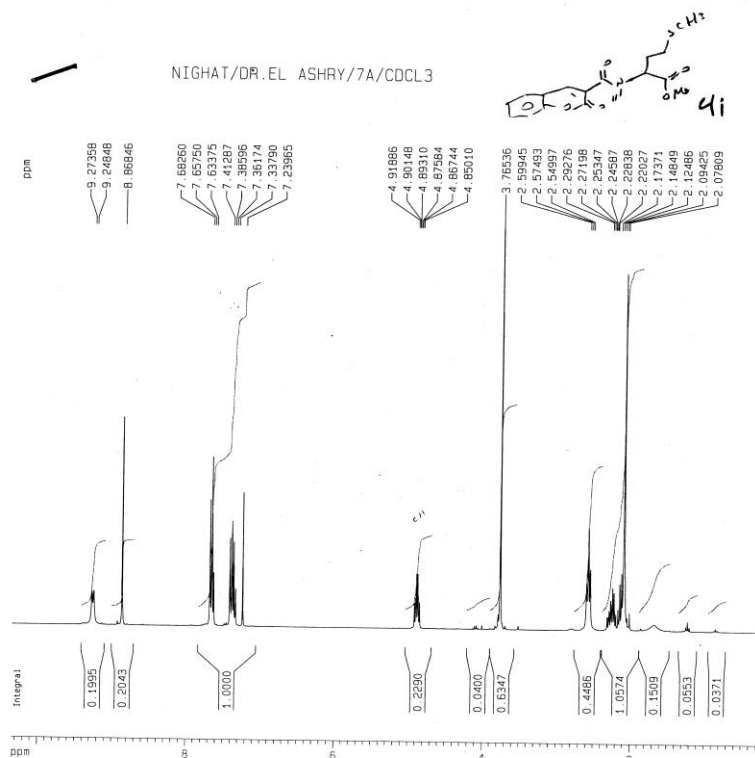

AVANCE AV 300  
LAB. No. 115

Current Data Parameters  
NAME nov01  
EXPNO 7  
PROCNO 1

F2 - Acquisition Parameters  
Date\_ 20071101  
Time 12:55  
INSTRUM spect  
PROBHD 5 mm DUL 13C-1  
PULPROG zg30  
TD 32768  
SOLVENT CDCl3  
NS 128  
DS 8  
SWH 5995.204 Hz  
FIDRES 0.182959 Hz  
AQ 2.7329011 sec  
RG 1149.4  
CW 83.400 usec  
DE 10.00 usec  
TE 0.0 K  
D1 1.00000000 sec  
MCREST 0.00000000 sec  
MCWRR 0.01500000 sec

\*\*\*\*\* CHANNEL f1 \*\*\*\*\*  
NUC1 1H  
P1 9.80 usec  
PL1 -3.00 dB  
SFO1 300.1324010 MHz

F2 - Processing parameters  
SI 16384  
SF 300.1300123 MHz  
WDW EM  
SSB 0  
LB 0.30 Hz  
GB 0  
PC 1.00

1D NMR plot parameters  
CX 20.00 cm  
CY 20.00 cm  
FIP 10.346 ppm  
F1 3105.60 Hz  
F2 0.189 ppm  
F3 56.58 Hz  
PPHMM 0.50795 ppm/cm  
HZCM 152.45122 Hz/cm

HEJ

11/1/2007

Page

File: 7A  
Sample: NIGHAT  
Instrument: JEOL MSRoute  
Inlet: My Inlet

Date Run: 11-01-2007 (Time Run: 12:42:17)

Ionization mode: EI+

4i

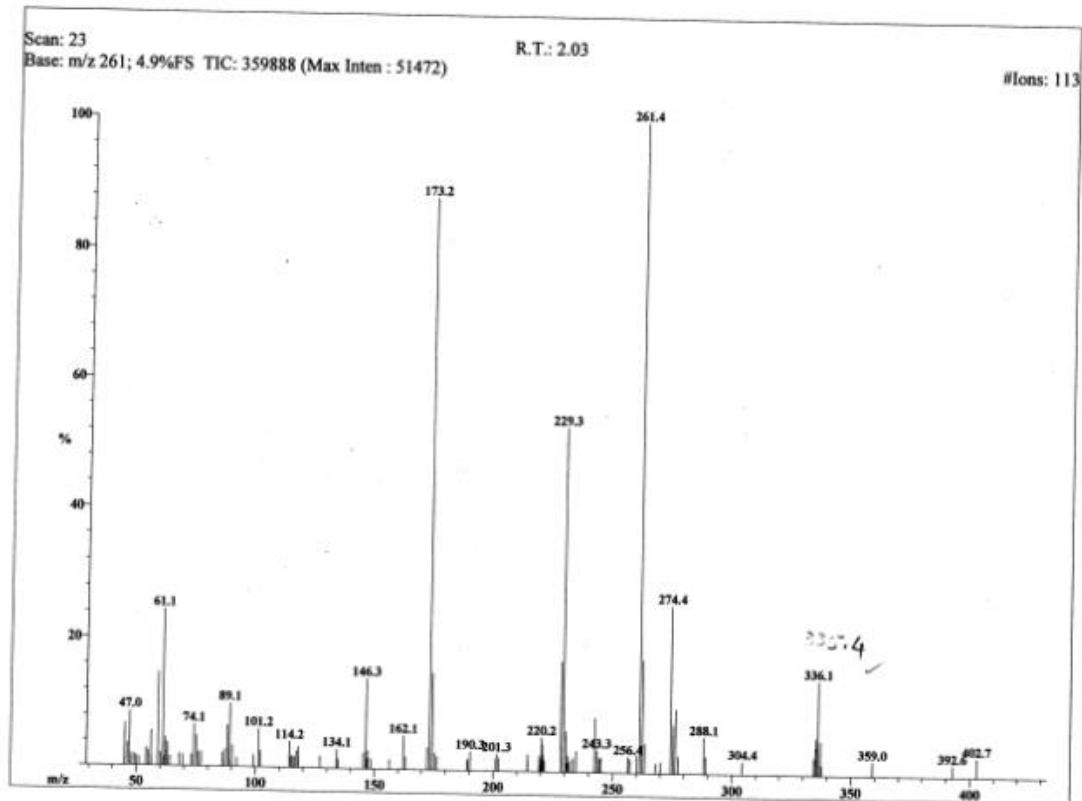

RAMADAN/DR.EL ASHRY/2A/CDCL3

1000000000  
100.0000000  
100.0000000

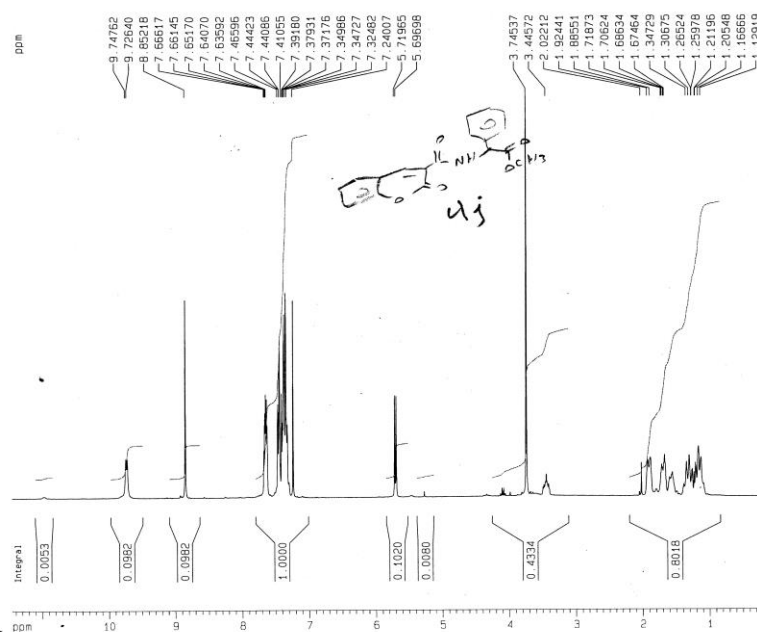

Current Data Parameters  
NAME oct31  
EXPNO 3  
PROCNO 1  
F2 - Acquisition Parameters  
Date\_ 20071031  
Time 12.29  
INSTRUM spect  
PROBHD 5 mm QNP 13C-1  
PULPROG zgpg30  
TD 32768  
SOLVENT CDCL3  
NS 128  
DS 0  
SWH 5995.204 Hz  
FIDRES 0.182959 Hz  
AQ 2.7329011 sec  
RG 1149.4  
DM 83.400 usec  
DE 10.00 usec  
TE 0.0 K  
D1 1.00000000 sec  
MCREST 0.00000000 sec  
MCWRR 0.01500000 sec

\*\*\*\*\* CHANNEL f1 \*\*\*\*\*  
NUC1 13C  
P1 9.80 usec  
PL1 -3.00 dB  
SFO1 300.1324010 MHz

F2 - Processing parameters  
SI 16384  
SF 300.1300123 MHz  
WDW EM  
SSB 0  
LB 0.30 Hz  
GB 0  
PC 1.00

1D NMR plot parameters  
CX 20.00 cm  
CY 20.00 cm  
F1P 11.456 ppm  
F1 3438.33 Hz  
F2P 0.188 ppm  
F2 50.53 Hz  
PRCM 0.56439 ppm/cm  
HZCM 169.39023 Hz/cm

MASS SPECTRUM Data File: 2A 8-NQU- 7 f1:45  
Sample: HEJ  
RT: 0.09 min FAB (Pos.) GC 1.4c BP: m/z 241.0000 Int. 54.0424 Lu 1.00  
Scan# (2)

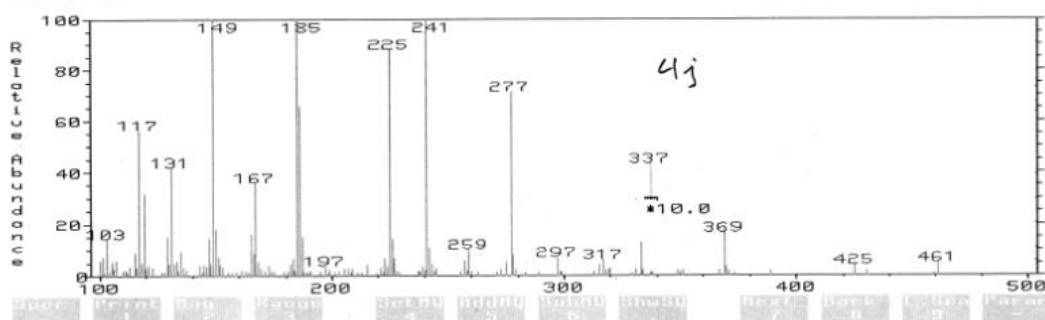

NIGHT/DR.EL ASHRY/9A/COCL3

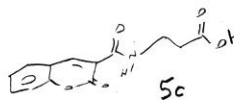

ANAL AV 300  
LAB No. 11

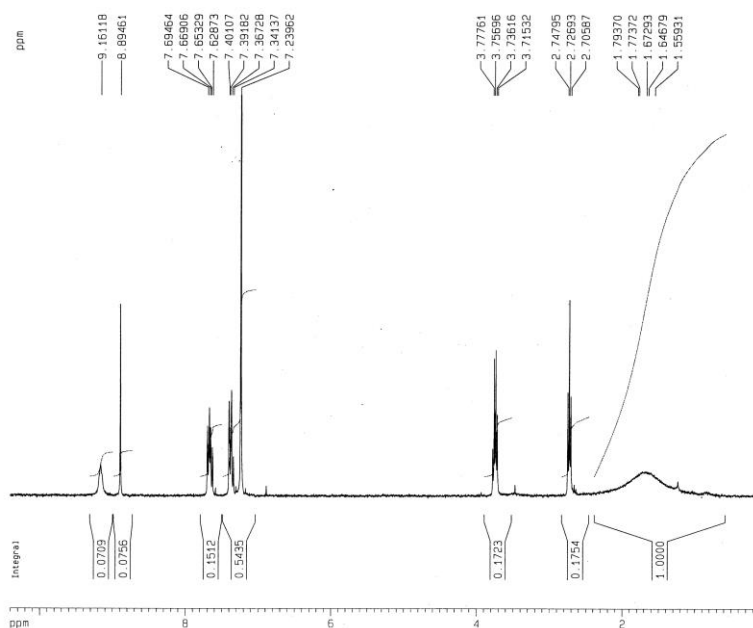

Current Data Parameters  
NAME nov05  
EXPNO 3  
PROCNO 1

F2 - Acquisition Parameters  
Date\_ 20071105  
Time 10.26  
INSTRUM spect  
PROBHD 5 mm QNP 13C-1  
PULPROG zg30  
TD 32768  
SOLVENT COCL3  
NS 128  
DS 0  
SWH 5995.204 Hz  
FIDRES 0.182559 Hz  
AQ 2.7329011 sec  
RG 3251  
DM 83.400 usec  
DE 10.00 usec  
TE 0.0 K  
D1 1.00000000 sec  
MCREST 0.00000000 sec  
MCWRK 0.01500000 sec

\*\*\*\*\* CHANNEL f1 \*\*\*\*\*  
NUC1 1H  
P1 9.80 usec  
PL1 -3.00 dB  
SFO1 300.1324010 MHz

F2 - Processing parameters  
S1 16384  
SF 300.1300123 MHz  
WDW EM  
SSB 0  
LB 0.30 Hz  
GB 0  
PC 1.00

1D NMR plot parameters  
CX 20.00 cm  
CY 40.00 cm  
F1P 10.408 ppm  
F1 3123.75 Hz  
F2P 0.068 ppm  
F2 20.28 Hz  
PPMCH 0.51702 ppm/cm  
HZCM 155.17355 Hz/cm

HEJ  
11/1/2007

Page 1

File: 9A  
Sample: NIGHTAT  
Instrument: JEOL MSRoute  
Inlet: My Inlet

Date Run: 11-01-2007 (Time Run: 14:19:05)

Ionization mode: EI+

5c

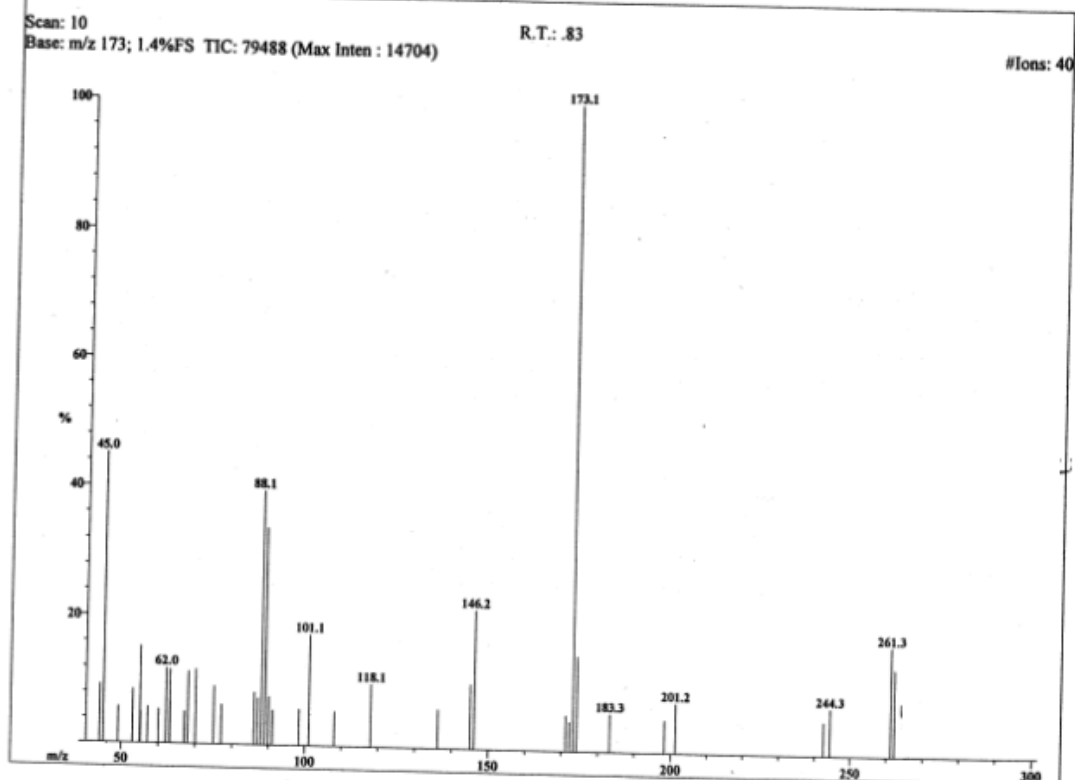

NIGHAT/DR:EL ASHRY/10A/CDCL3

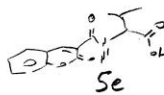

AVANCE AV 300  
LAB. No. 115

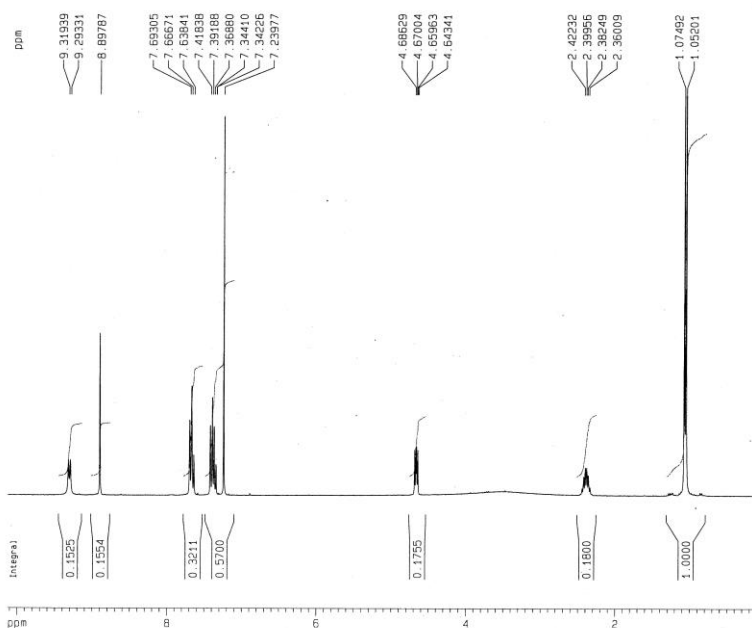

Current Data Parameters  
NAME nov05  
EXPNO 5  
PROCNO 1

F2 - Acquisition Parameters  
Date\_ 20071105  
Time 11.13  
INSTRUM spect  
PROBHD 5 mm DUL 13C-1  
PULPROG zg30  
TO 32768  
SOLVENT CDCL3  
NS 128  
DS 0  
SWH 5995.204 Hz  
FIDRES 0.182959 Hz  
AQ 2.7329011 sec  
RG 3251  
DW 83.400 usec  
DE 10.00 usec  
TE 0.0 K  
D1 1.00000000 sec  
MCREST 0.00000000 sec  
MCWRK 0.01500000 sec

\*\*\*\*\* CHANNEL f1 \*\*\*\*\*  
NUC1 1H  
P1 9.80 usec  
PL1 -3.00 dB  
SFO1 300.1324010 MHz

F2 - Processing parameters  
SI 16384  
SF 300.1300123 MHz  
WDW EM  
SSB 0  
LB 0.30 Hz  
GB 0  
PC 1.00

1D NMR plot parameters  
CX 20.00 cm  
CY 12.50 cm  
F1P 10.126 ppm  
F2P 3039.06 Hz  
F2P 0.047 ppm  
F2 14.23 Hz  
PPMCH 0.50392 ppm/cm  
HZCM 151.24129 Hz/cm

HEJ  
11/1/2007

Pag

File: 10A  
Sample: NIGHAT  
Instrument: JEOL MSRoute  
Inlet: My Inlet

Date Run: 11-01-2007 (Time Run: 14:08:57)

Ionization mode: EI+

Se

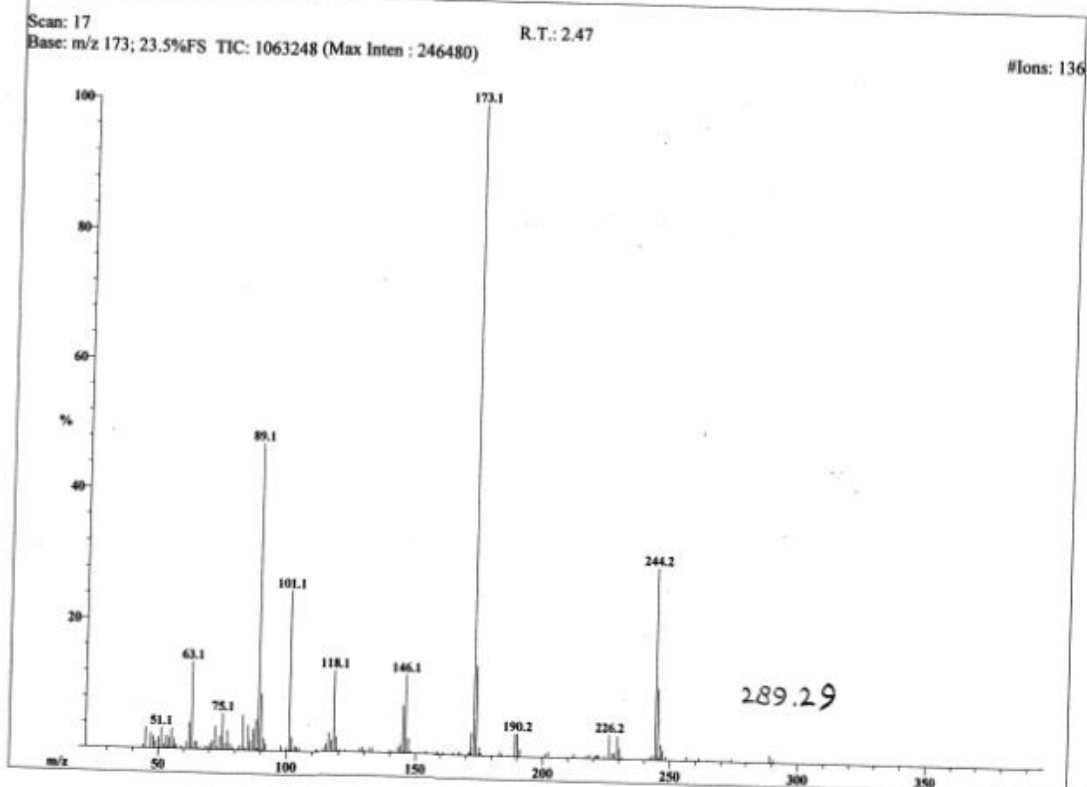

NIGHAT/DR.EL. ASHRY/12A/CDCL3

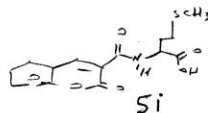

AVANCE AV 300  
LAB. No. 115

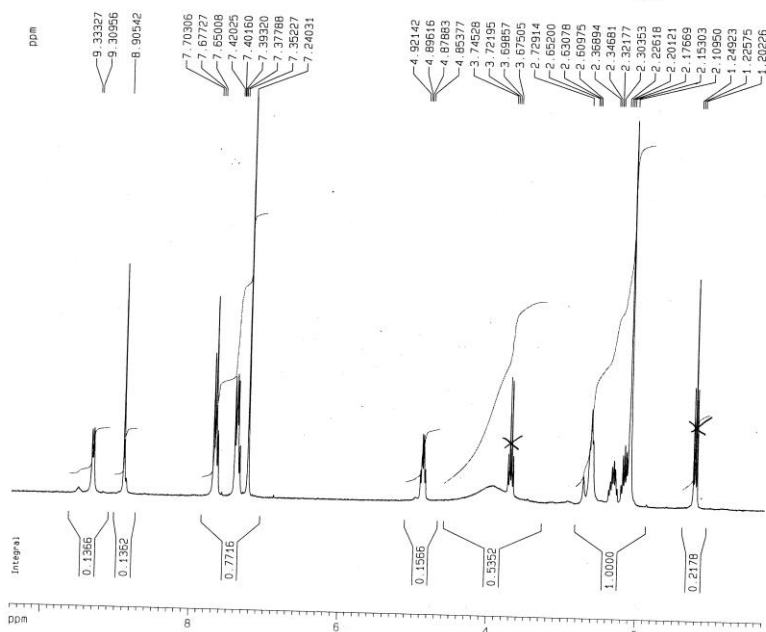

Current Data Parameters  
NAME oct31  
EXPNO 7  
PROCNO 1

F2 - Acquisition Parameters  
Date\_ 20071031  
Time 13.14  
INSTRUM spect  
PROBHD 5 mm DUL 13C-1  
PULPROG zg30  
TD 32768  
SOLVENT CDCL3  
NS 128  
DS 0  
SWH 5995.204 Hz  
FIDRES 0.182959 Hz  
AQ 2.7329011 sec  
RG 2298.8  
DW 83.400 usec  
DE 10.00 usec  
TE 0.0 K  
D1 1.00000000 sec  
MCREST 0.00000000 sec  
MCMRK 0.01500000 sec

\*\*\*\*\* CHANNEL f1 \*\*\*\*\*  
NUC1 1H  
P1 9.80 usec  
PL1 -3.00 dB  
SFO1 300.1324010 MHz

F2 - Processing parameters  
SI 16384  
SF 300.1300123 MHz  
WDW EM  
SSB 0  
LB 0.30 Hz  
GB 0  
PC 1.00

1D NMR plot parameters  
CX 20.00 cm  
CY 15.00 cm  
F1P 10.408 ppm  
F1 3123.75 Hz  
F2P 0.289 ppm  
F2 86.83 Hz  
PPMCH 0.50593 ppm/cm  
HZCM 151.84624 Hz/cm

HEJ

11/1/2007

Page 1

File: 12A  
Sample: NIGHAT  
Instrument: JEOL MSRoute  
Inlet: My Inlet

Date Run: 11-01-2007 (Time Run: 13:59:50)

Ionization mode: EI+

Si

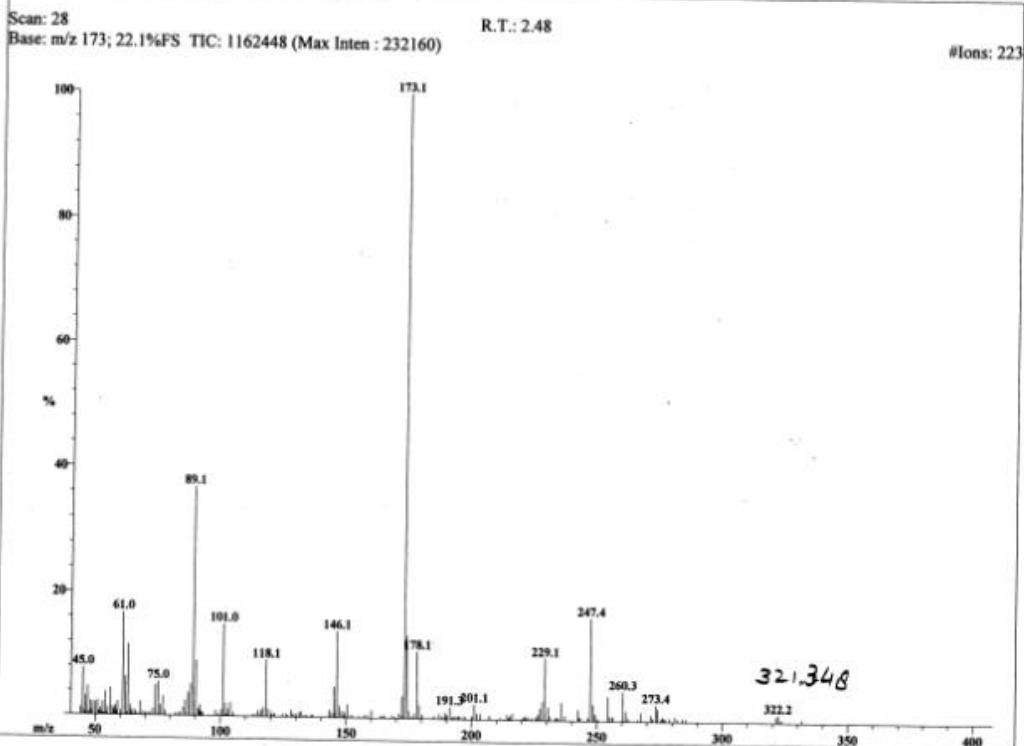

NIGHT/DR:EL ASHRY/16A/CDCL3

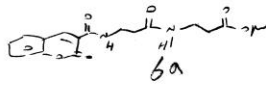

AVANCE AV 300  
LAB. No. 115

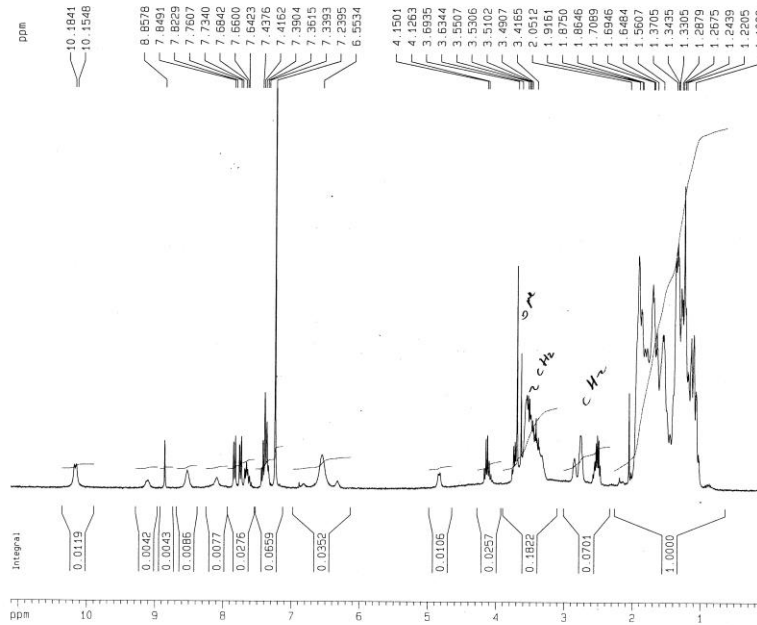

Current Data Parameters  
NAME nov08  
EXPNO 3  
PROCNO 1

F2 - Acquisition Parameters  
Date\_ 20071108  
Time 10.56  
INSTRUM spect  
PROBHD 5 mm DUL 13C-1  
PULPROG zg30  
TO 32768  
SOLVENT CDCL3  
NS 128  
DS 0  
SWH 5995.204 Hz  
FIDRES 0.182959 Hz  
AQ 2.7329011 sec  
RG 1290.2  
DM 83.400 usec  
DE 10.00 usec  
TE 0.0 K  
D1 1.00000000 sec  
MCREST 0.00000000 sec  
MCMRK 0.01500000 sec

\*\*\*\*\* CHANNEL f1 \*\*\*\*\*  
NUC1 1H  
P1 9.80 usec  
PL1 -3.00 dB  
SFO1 300.1324010 MHz

F2 - Processing parameters  
SI 16384  
SF 300.1300123 MHz  
EM  
SSB 0  
LB 0.30 Hz  
GB 0  
PC 1.00

1D NMR plot parameters  
CX 20.00 cm  
CY 20.00 cm  
F1P 11.113 ppm  
F1 3335.49 Hz  
F2P 0.068 ppm  
F2 20.28 Hz  
PPMCM 0.55230 ppm/cm  
HZCM 165.76044 Hz/cm

HEJ  
11/3/2007

Page 1

File: 16A  
Sample: NIGHT  
Instrument: JEOL MSRoute  
Inlet: My Inlet

Date Run: 11-03-2007 (Time Run: 14:40:31)

Ionization mode: EI-

6a

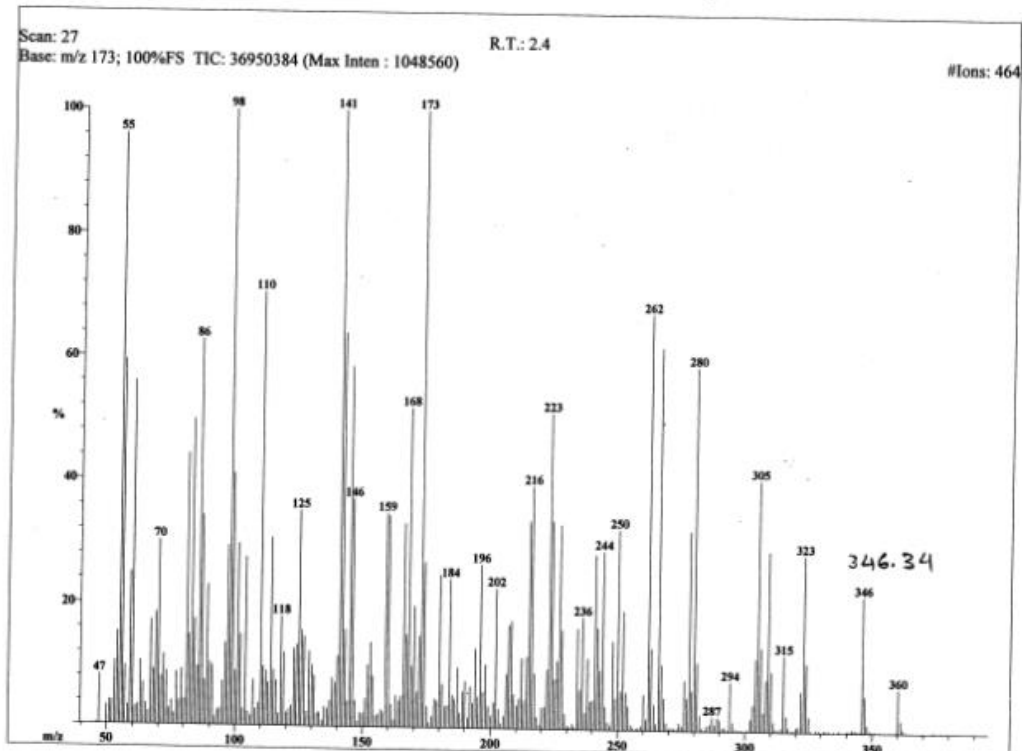

NIGHT/DR. EL ASHRY/13A/CDCL3

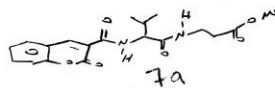

AVANCE AT 300  
LAB. No. 115

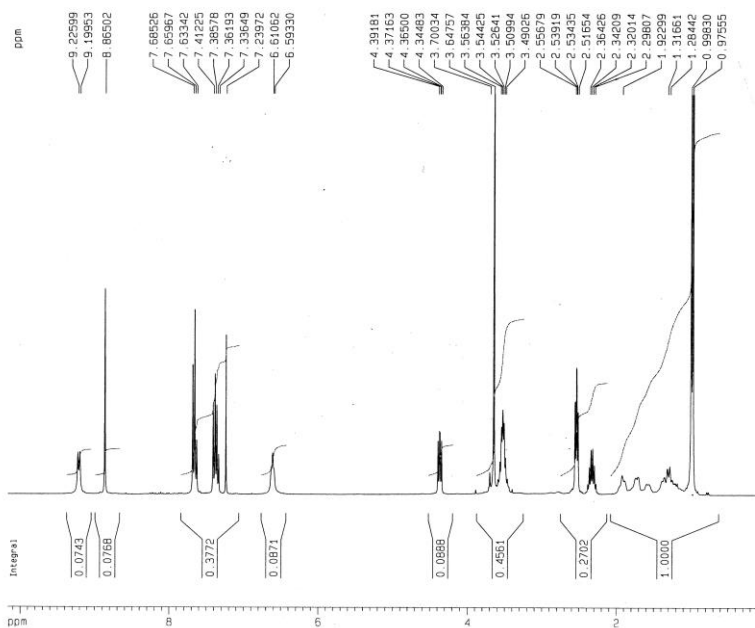

Current Data Parameters  
NAME oct31  
EXPNO 9  
PROCNO 1

F2 - Acquisition Parameters  
Date\_ 20071031  
Time 14.42  
INSTRUM spect  
PROBHD 5 mm DUL 13C-1  
PULPROG zg30  
TD 32768  
SOLVENT CDCl3  
NS 128  
DS 0  
SWH 5995.204 Hz  
FIDRES 0.182959 Hz  
AQ 2.7329011 sec  
RG 724.1  
OW 83.400 usec  
DE 10.00 usec  
TE 0.0 K  
D1 1.00000000 sec  
MCREST 0.00000000 sec  
MCWAK 0.01500000 sec

\*\*\*\*\* CHANNEL f1 \*\*\*\*\*  
NUC1 1H  
P1 9.80 usec  
PL1 -3.00 dB  
SF01 300.1324010 MHz

F2 - Processing parameters  
SI 16384  
SF 300.1300123 MHz  
WDW EM  
SSB 0  
LB 0.30 Hz  
GB 0  
PC 1.00

1D NMR plot parameters  
CX 20.00 cm  
CY 20.00 cm  
FAP 10.166 ppm  
F1 3051.16 Hz  
F2P 0.068 ppm  
F2 20.28 Hz  
PPMCH 0.50493 ppm/cm  
HZCH 151.54376 Hz/cm

HEJ

11/3/2007

Page 1

File: 13A  
Sample: NIGHT  
Instrument: JEOL MSRoute  
Inlet: My Inlet

Date Run: 11-03-2007 (Time Run: 14:12:08)

Ionization mode: EI-

7a

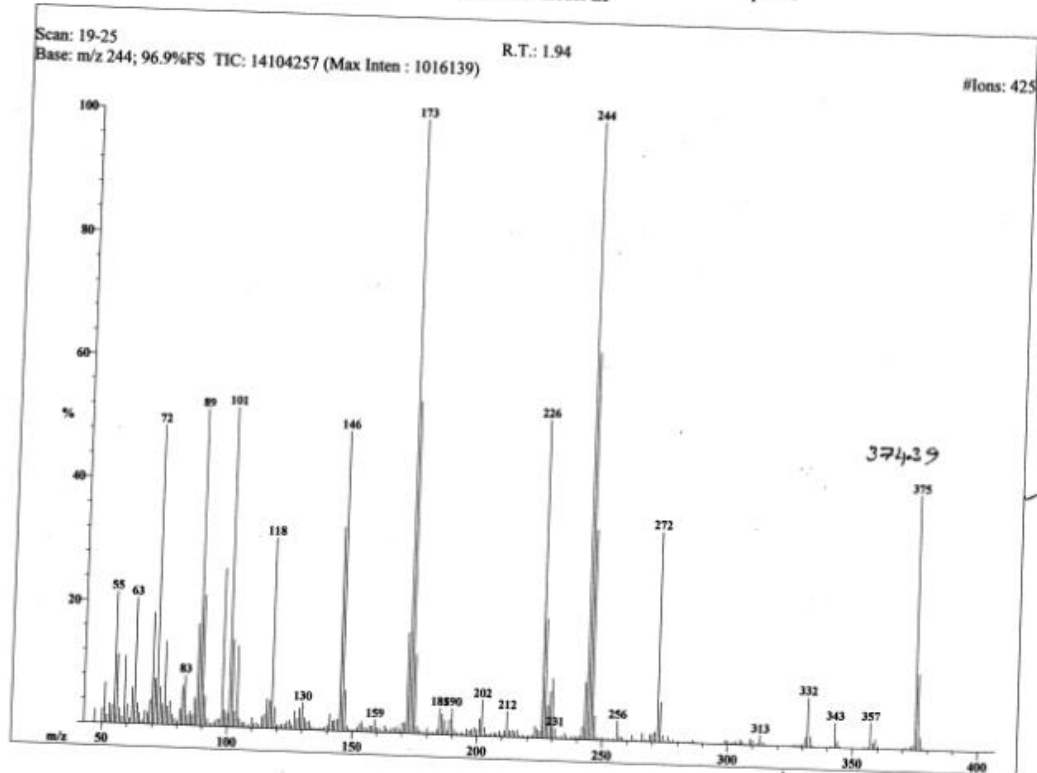

NIGHAT/DR:EL ASHRY/14A/CDCL3

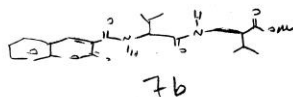

AI 300  
Lab No 115

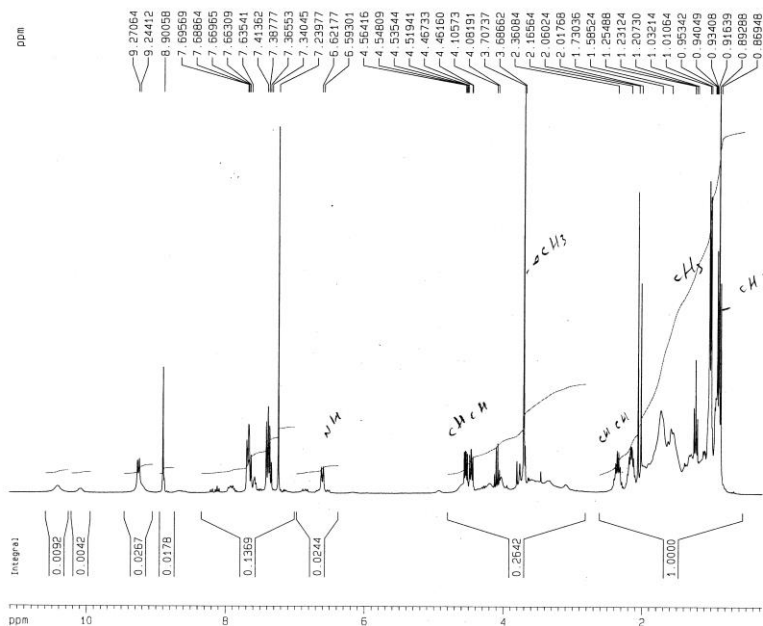

Current Data Parameters  
NAME nov03  
EXPNO 7  
PROCNO 1

F2 - Acquisition Parameters  
Date\_ 20071103  
Time 12.43  
INSTRUM spect  
PROBHD 5 mm QNP 13C-1  
PULPROG zg30  
TD 32768  
SOLVENT CDCl3  
NS 128  
DS 0  
SWH 5995.204 Hz  
FIDRES 0.162959 Hz  
AQ 2.7329011 sec  
RG 724.1  
OW 83.400 usec  
DE 10.00 usec  
TE 0.0 K  
D1 1.00000000 sec  
MCREST 0.00000000 sec  
MCWRR 0.01500000 sec

\*\*\*\*\* CHANNEL f1 \*\*\*\*\*  
NUC1 1H  
P1 9.80 usec  
PL1 -3.00 dB  
SF01 300.1324010 MHz

F2 - Processing parameters  
SI 16384  
SF 300.1300123 MHz  
WDW EM  
SSB 0  
LB 0.30 Hz  
GB 0  
PC 1.00

1D NMR plot parameters  
CX 20.00 cm  
CY 13.00 cm  
F1P 11.113 ppm  
F1 3335.49 Hz  
F2P 0.269 ppm  
F2 80.78 Hz  
PPMCH 0.54222 ppm/cm  
HZCM 162.73561 Hz/cm

HEJ

11/3/2007

Page 1

File: 14A  
Sample: NIGHAT  
Instrument: JEOL MSRoute  
Inlet: My Inlet

Date Run: 11-03-2007 (Time Run: 14:19:43)

Ionization mode: EI-

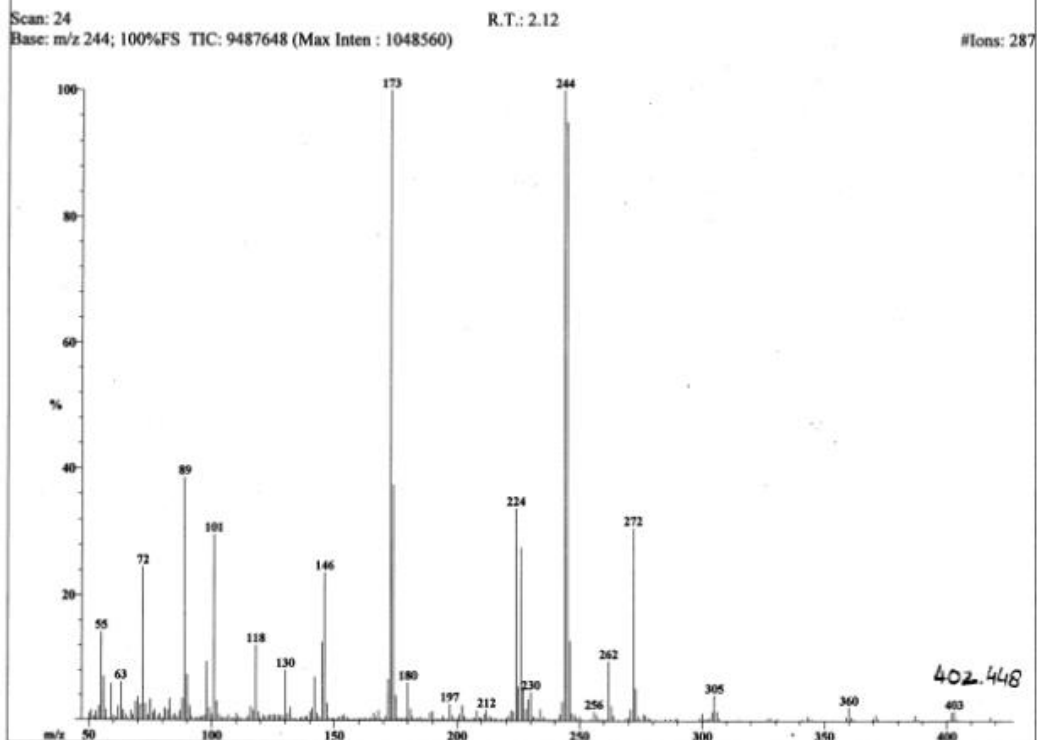

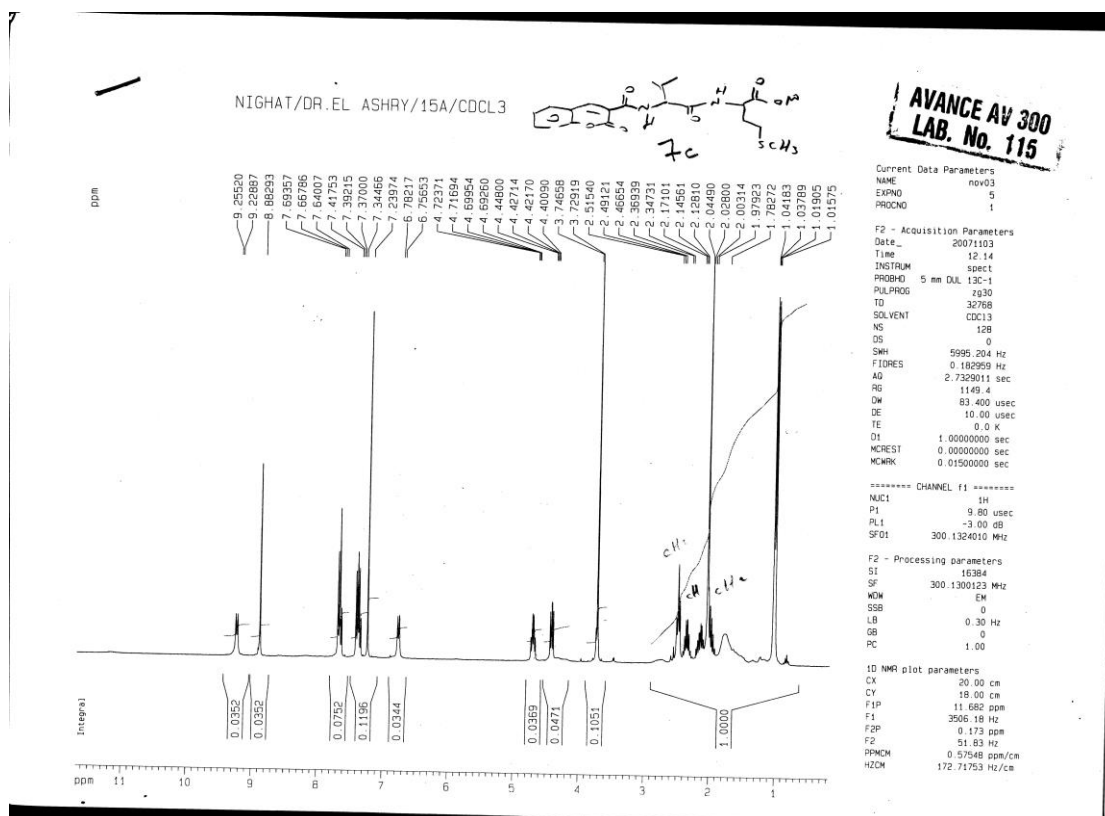

HEJ  
11/3/2007

Page 1

File: 15A  
Sample: NIGHAT  
Instrument: JEOL MSRoute  
Inlet: My Inlet

Date Run: 11-03-2007 (Time Run: 14:26:53)

Ionization mode: EI-

7c

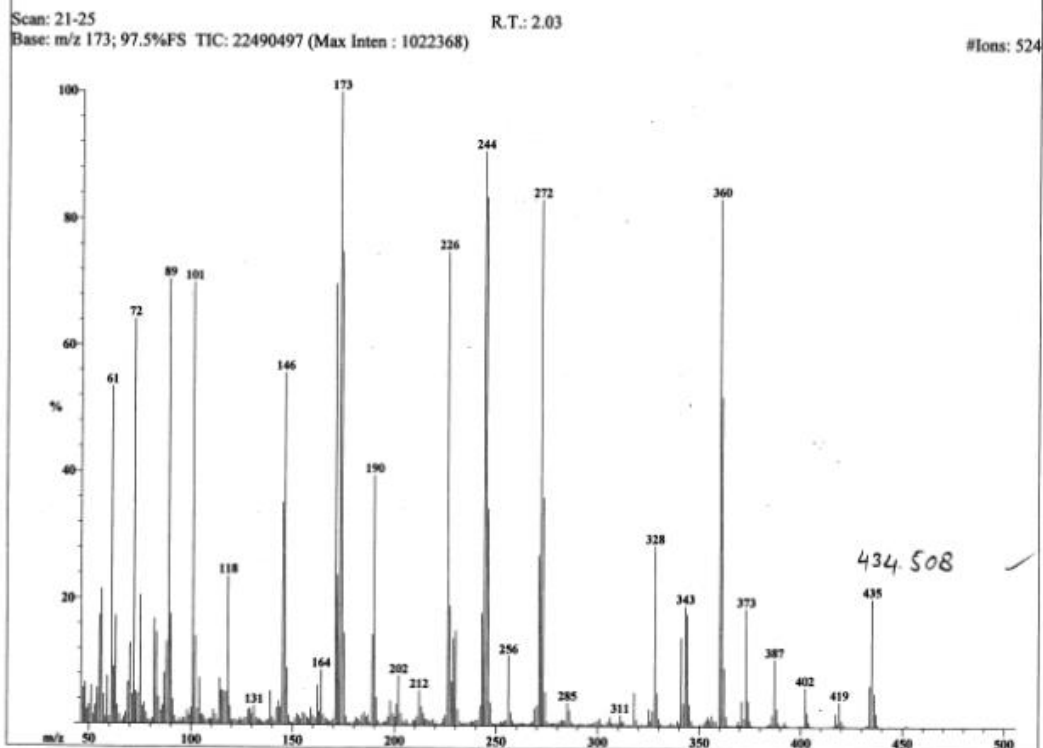

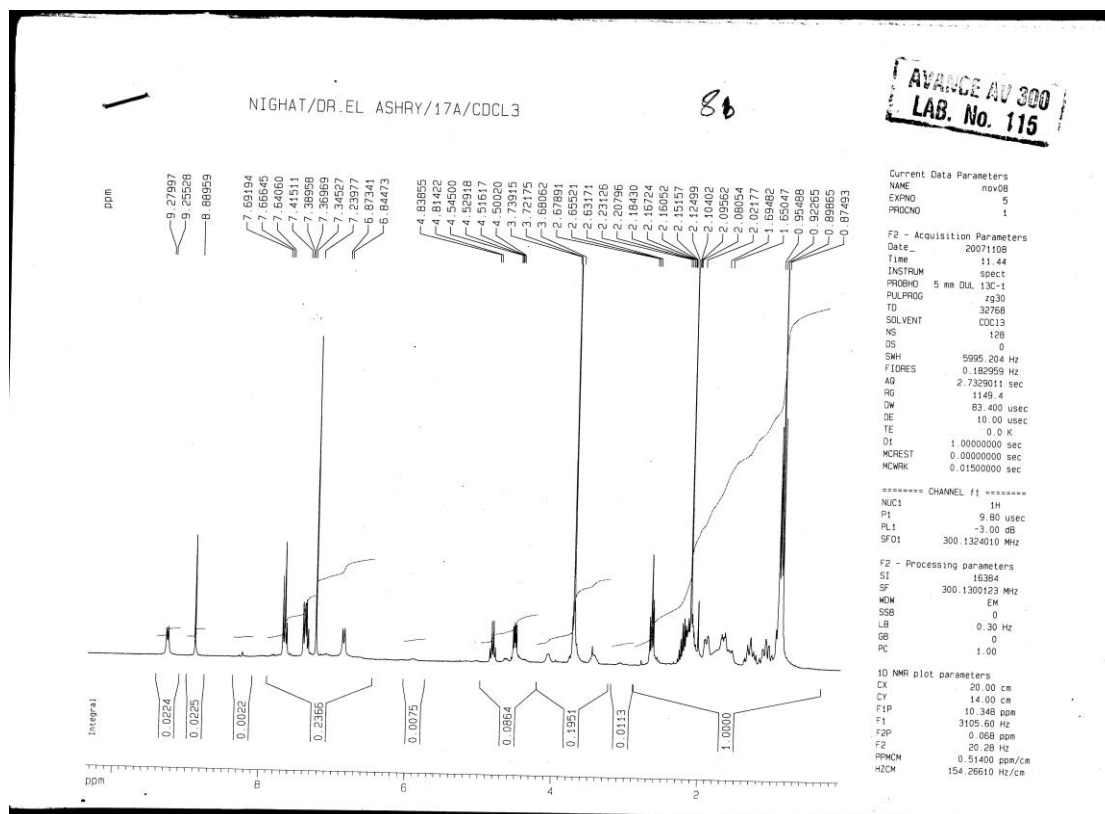

HEJ  
11/3/2007

Page 1

File: 17A  
Sample: NIGHAT  
Instrument: JEOL MSRoute  
Inlet: My Inlet

Date Run: 11-03-2007 (Time Run: 14:47:44)

Ionization mode: EI-

8b

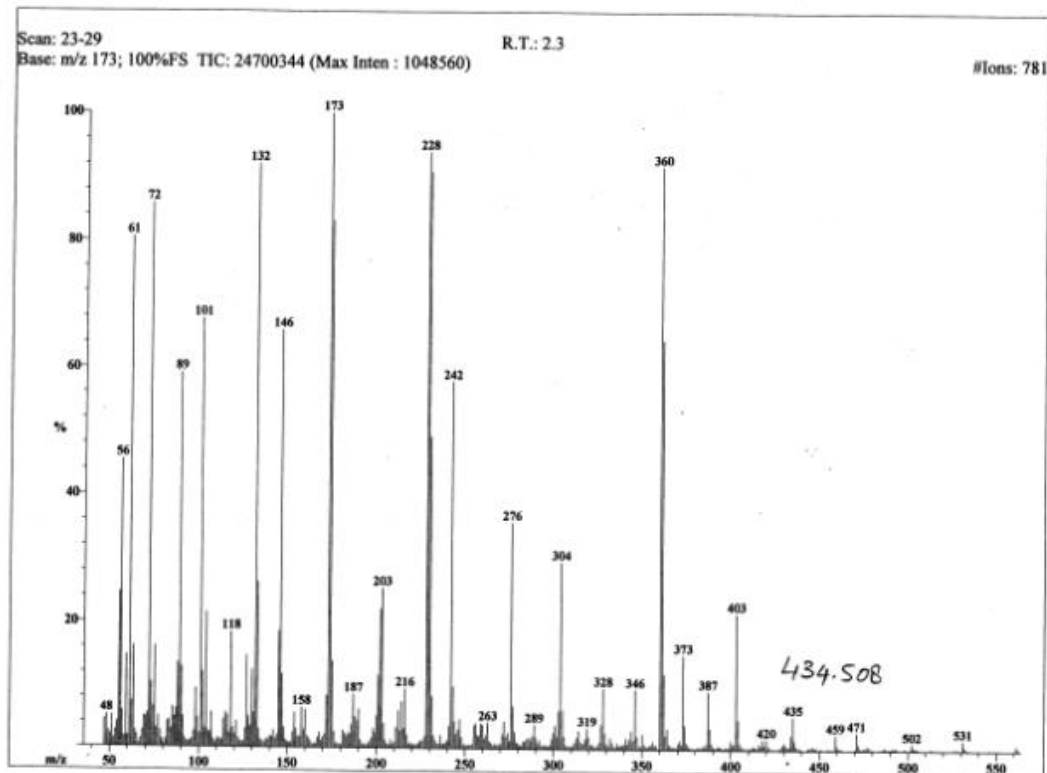

Supplement: s1 [file s1]
